# Supplementary material
Source: HighWire-hosted journal article supplement (https://erj.ersjournals.com/content/60/4/2102058)
Supplement: inline-supplementary-material-2 [file inline-supplementary-material-2.pdf]

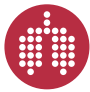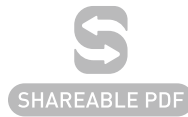

# Dynamic contrast enhanced MRI for the evaluation of lung perfusion in idiopathic pulmonary fibrosis

Luis A. Torres <sup>1</sup>, Kristine E. Lee <sup>2</sup>, Gregory P. Barton <sup>1</sup>, Andrew D. Hahn <sup>1</sup>, Nathan Sandbo <sup>3</sup>, Mark L. Schiebler <sup>3,4</sup> and Sean B. Fain <sup>1,4,5,6</sup>

<sup>1</sup>Dept of Medical Physics, School of Medicine and Public Health, University of Wisconsin – Madison, Madison, WI, USA. <sup>2</sup>Dept of Biostatistics and Medical Informatics, School of Medicine and Public Health, University of Wisconsin – Madison, Madison, WI, USA. <sup>3</sup>Dept of Medicine, School of Medicine and Public Health, University of Wisconsin – Madison, Madison, WI, USA. <sup>4</sup>Dept of Radiology, School of Medicine and Public Health, University of Wisconsin – Madison, Madison, WI, USA. <sup>5</sup>Dept of Biomedical Engineering, College of Engineering, University of Wisconsin – Madison, Madison, WI, USA. <sup>6</sup>Dept of Radiology, Carver College of Medicine, University of Iowa, Iowa City, IA, USA.

Corresponding author: Sean B. Fain ([sean-fain@uiowa.edu](mailto:sean-fain@uiowa.edu))

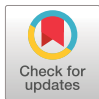

Shareable abstract (@ERSpublications)

DCE-MRI quantitative perfusion and semiquantitative transit time metrics identified regional deficits in IPF lung disease relative to healthy control subjects and in IPF progression <https://bit.ly/3swKH6r>

**Cite this article as:** Torres LA, Lee KE, Barton GP, *et al.* Dynamic contrast enhanced MRI for the evaluation of lung perfusion in idiopathic pulmonary fibrosis. *Eur Respir J* 2022; 60: 2102058 [DOI: 10.1183/13993003.02058-2021].

This single-page version can be shared freely online.

Copyright ©The authors 2022.  
For reproduction rights and  
permissions contact  
[permissions@ersnet.org](mailto:permissions@ersnet.org)

Received: 24 July 2021  
Accepted: 24 Feb 2022

## Abstract

**Background** The objective of this work was to apply quantitative and semiquantitative dynamic contrast enhanced magnetic resonance imaging (DCE-MRI) methods to evaluate lung perfusion in idiopathic pulmonary fibrosis (IPF).

**Methods** In this prospective trial 41 subjects, including healthy control and IPF subjects, were studied using DCE-MRI at baseline. IPF subjects were then followed for 1 year; progressive IPF (IPF<sub>prog</sub>) subjects were distinguished from stable IPF (IPF<sub>stable</sub>) subjects based on a decline in percent predicted forced vital capacity (FVC % pred) or diffusing capacity of the lung for carbon monoxide ( $D_{LCO}$  % pred) measured during follow-up visits. 35 out of 41 subjects were retained for final baseline analysis (control: n=15; IPF<sub>stable</sub>: n=14; IPF<sub>prog</sub>: n=6). Seven measures and their coefficients of variation (CV) were derived using temporally resolved DCE-MRI. Two sets of global and regional comparisons were made: control *versus* IPF groups and control *versus* IPF<sub>stable</sub> *versus* IPF<sub>prog</sub> groups, using linear regression analysis. Each measure was compared with FVC % pred,  $D_{LCO}$  % pred and the lung clearance index (LCI % pred) using a Spearman rank correlation.

**Results** DCE-MRI identified regional perfusion differences between control and IPF subjects using first moment transit time (FMTT), contrast uptake slope and pulmonary blood flow (PBF) ( $p \leq 0.05$ ), while global averages did not. FMTT was shorter for IPF<sub>prog</sub> compared with both IPF<sub>stable</sub> ( $p=0.004$ ) and control groups ( $p=0.023$ ). Correlations were observed between PBF CV and  $D_{LCO}$  % pred ( $r_s = -0.48$ ,  $p=0.022$ ) and LCI % pred ( $r_s = +0.47$ ,  $p=0.015$ ). Significant group differences were detected in age ( $p < 0.001$ ),  $D_{LCO}$  % pred ( $p < 0.001$ ), FVC % pred ( $p=0.001$ ) and LCI % pred ( $p=0.007$ ).

**Conclusions** Global analysis obscures regional changes in pulmonary haemodynamics in IPF using DCE-MRI in IPF. Decreased FMTT may be a candidate marker for IPF progression.
